# Supplementary material
Source: publisher site journal article supplement (http://www.dovepress.com/get_supplementary_file.php?f=299454.docx)
Supplement: Supplementary file 1 [file get_supplementary_file.php]

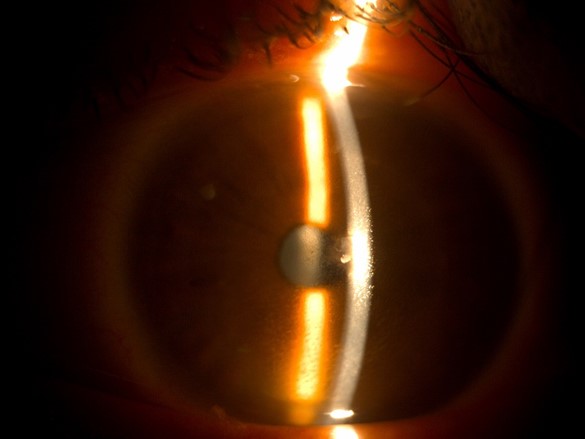


**e-figure 1: Slit lamp examination, day 25**


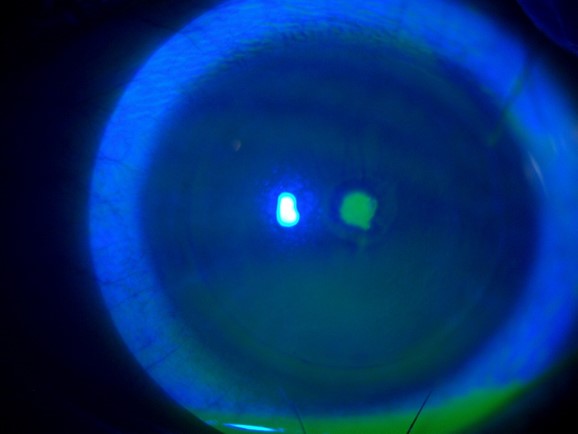


**e-figure 2: Slit lamp examination, day 25**


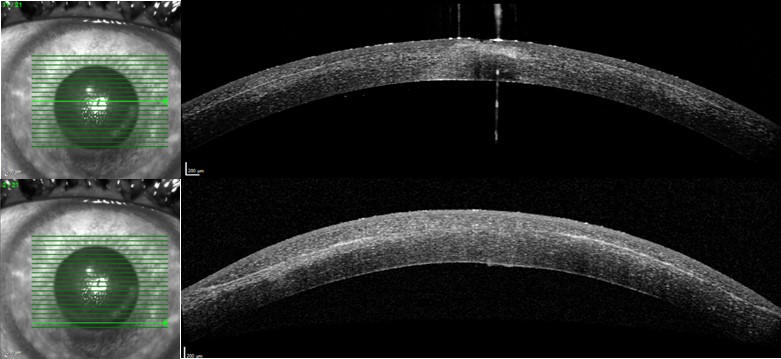


**e-figure 3: Anterior segment OCT, day 25**


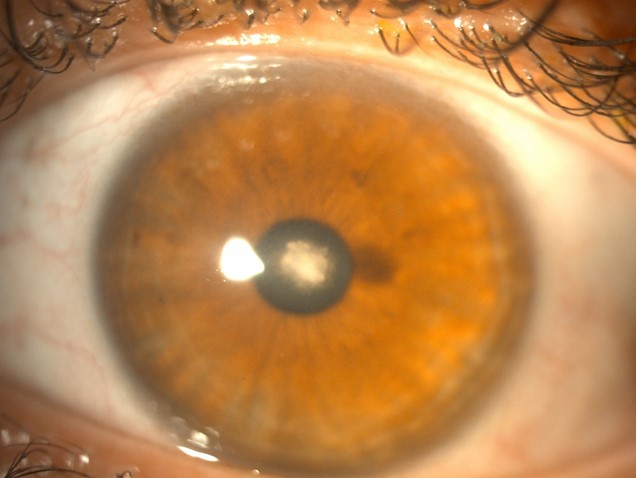


**e-figure 4: Slit lamp examination, day 28**


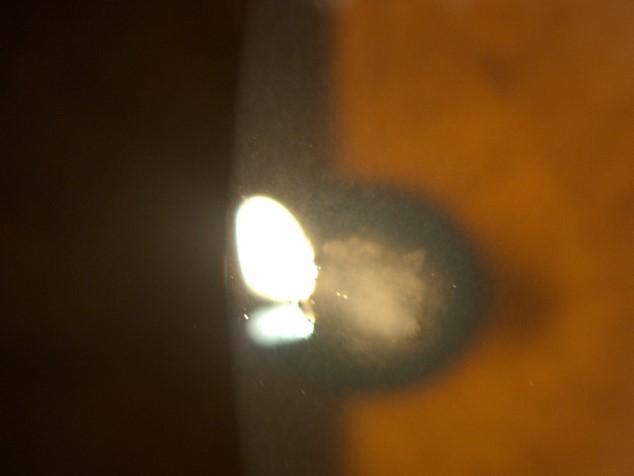


**e-figure 5: Slit lamp examination, day 28**


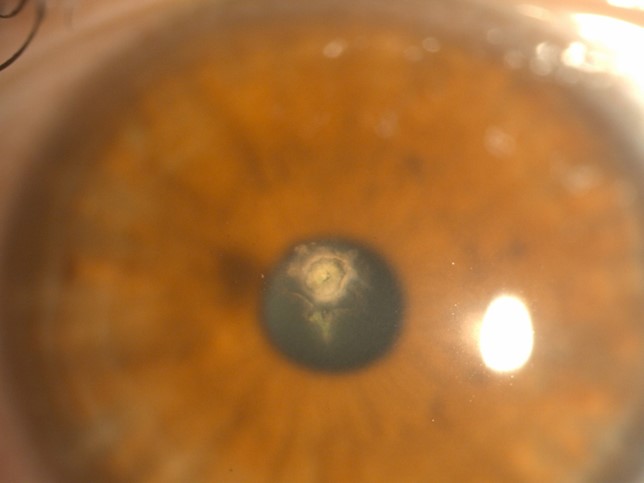


**e-figure 6: Slit lamp examination, day 33**


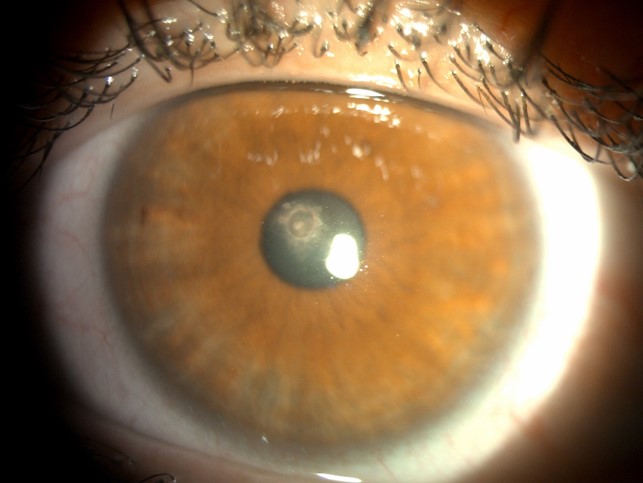


**e-figure 7: Slit lamp examination, day 40**


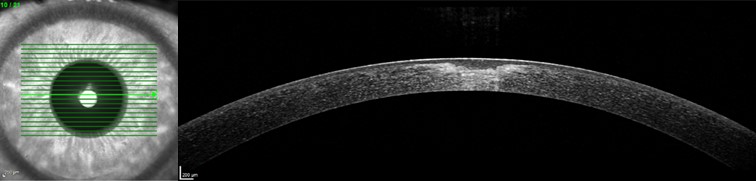


**e-figure 8: Anterior segment OCT, day 40**
